# Supplementary material
Source: MDPI journal article supplement (https://www.mdpi.com/2297-8739/10/5/289)
Supplement: s1 [file s1]

Supplementary Materials.

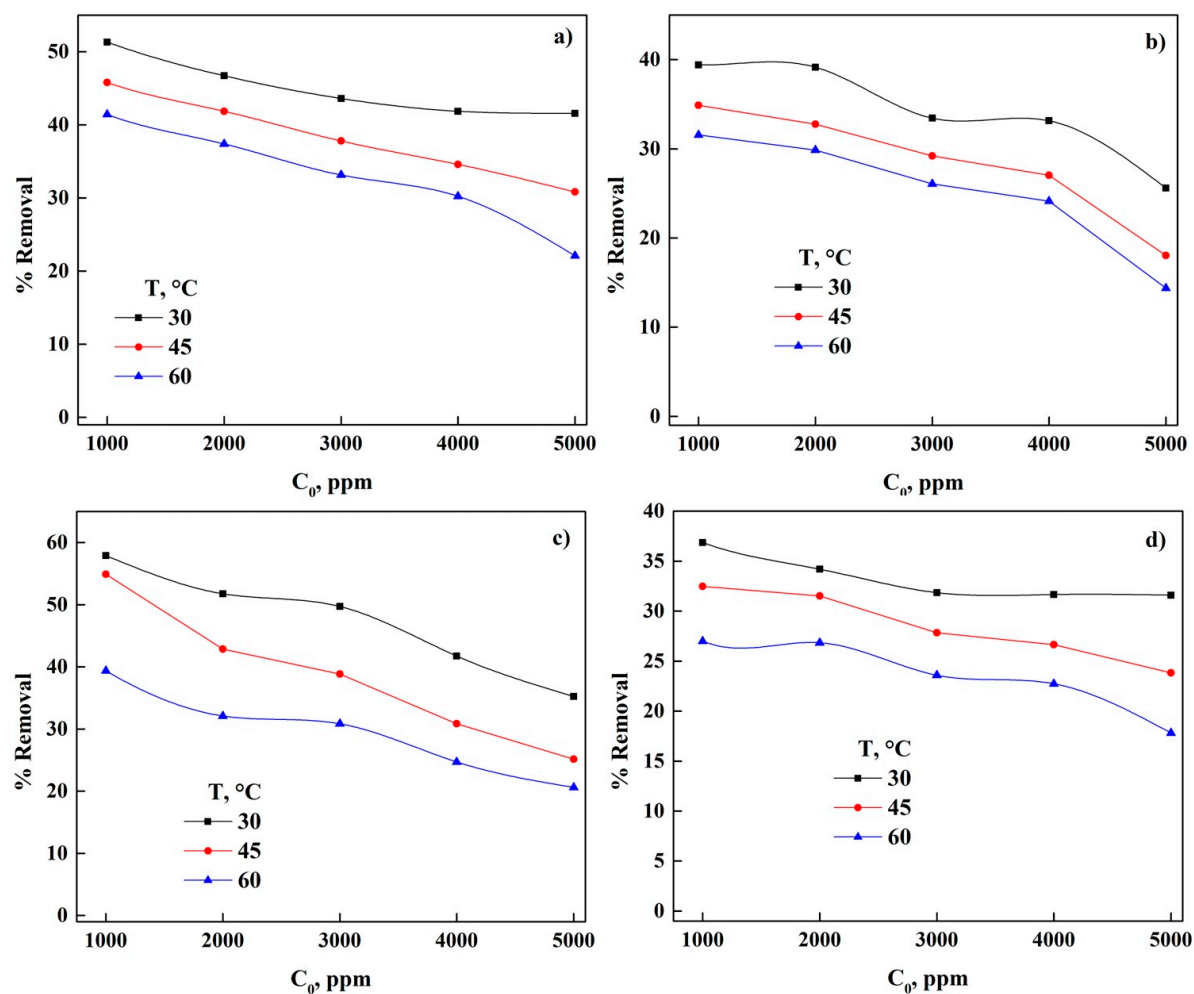

**Figure S1.** Effect on the removal of Ni(II) and Cu(II) due to the initial concentration: a) Ni-WLW, b) Cu-WLW, c) Ni-WLN and d) Cu-WLN

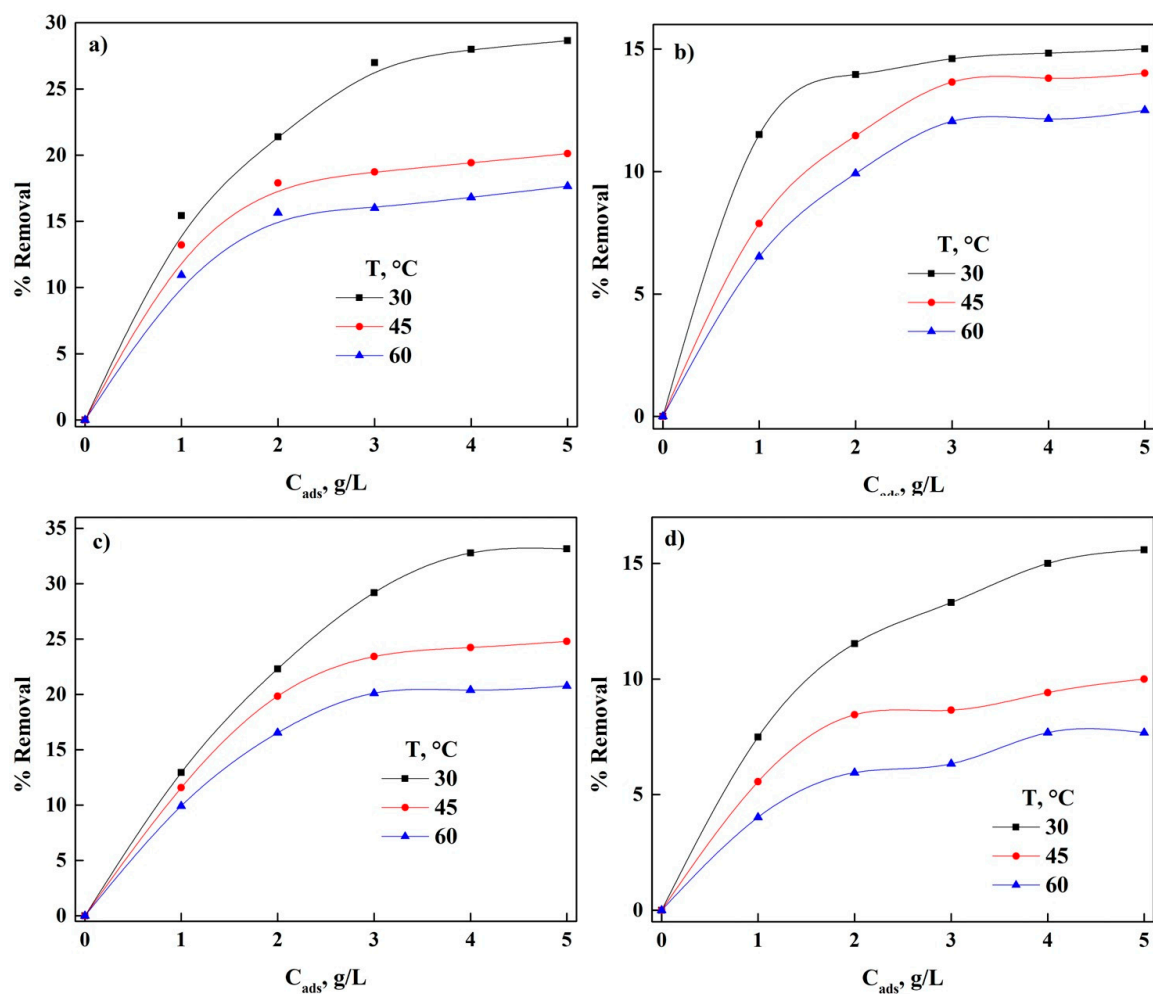

**Figure S2.** Effect of adsorbent concentration on Ni(II) and Cu(II) removal: a) Ni-WLW, b) Cu-WLW, c) Ni-WLN and d) Cu-WLN

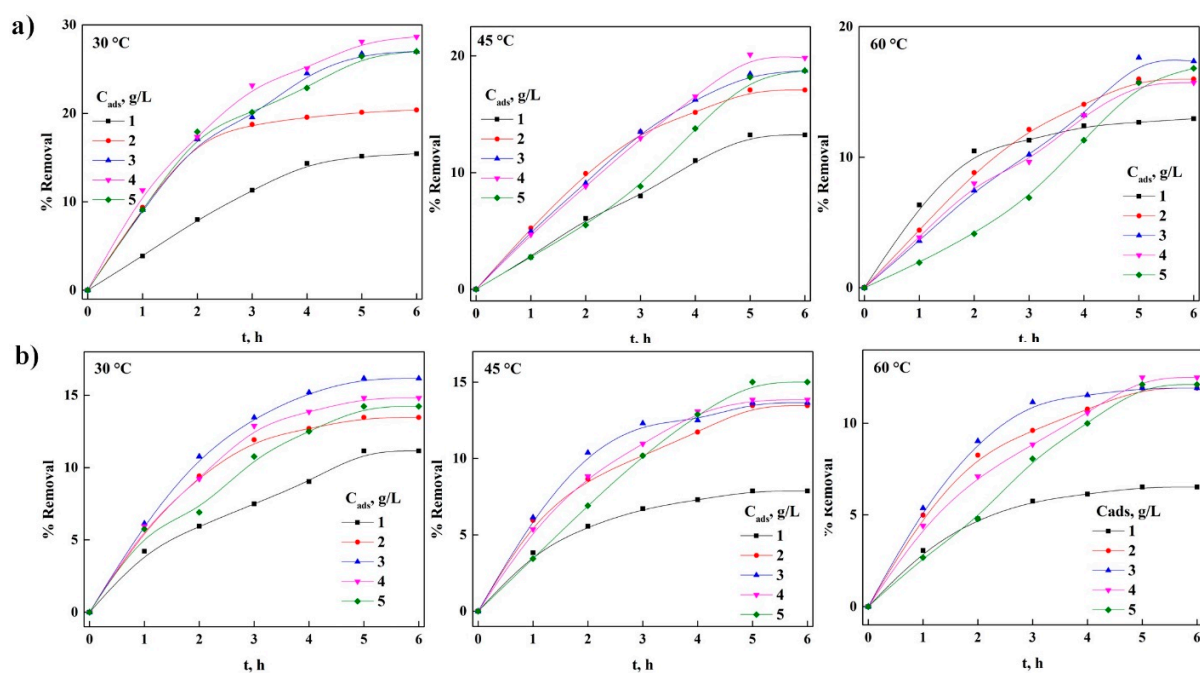

**Figure S3.** Effect of contact time on Ni(II) and Cu(II) removal using WLW as bioadsorbent: a) Ni and b) Cu

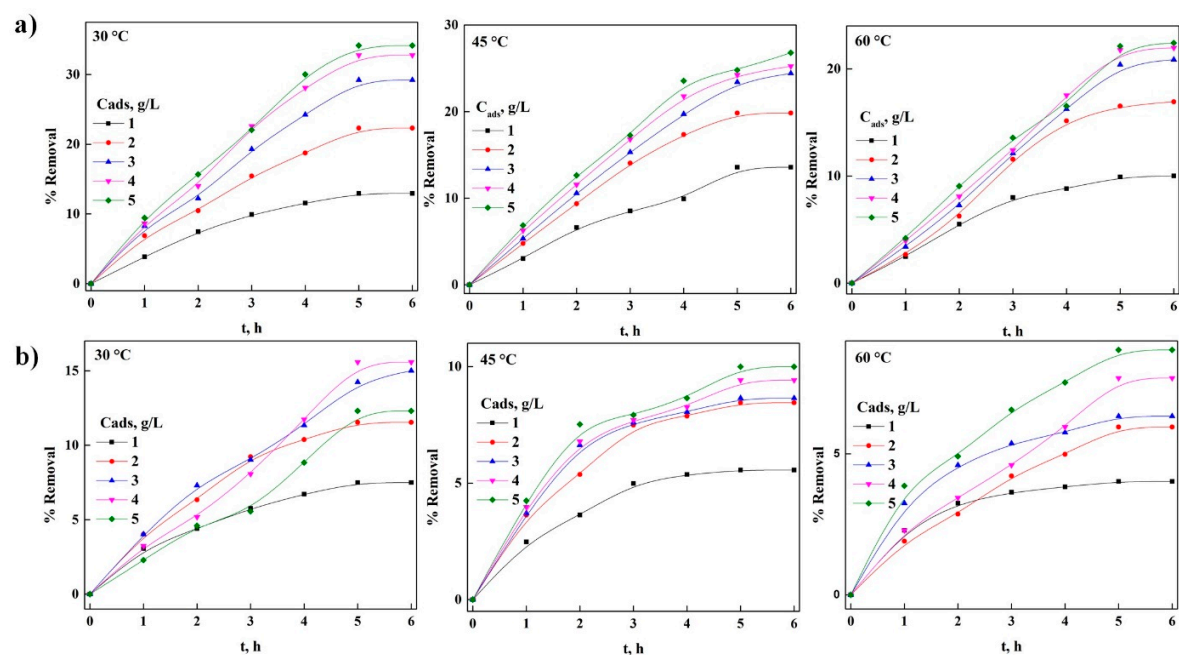

**Figure S4.** Effect of contact time on Ni(II) and Cu(II) removal using WLN as bioadsorbent: a) Ni and b) Cu

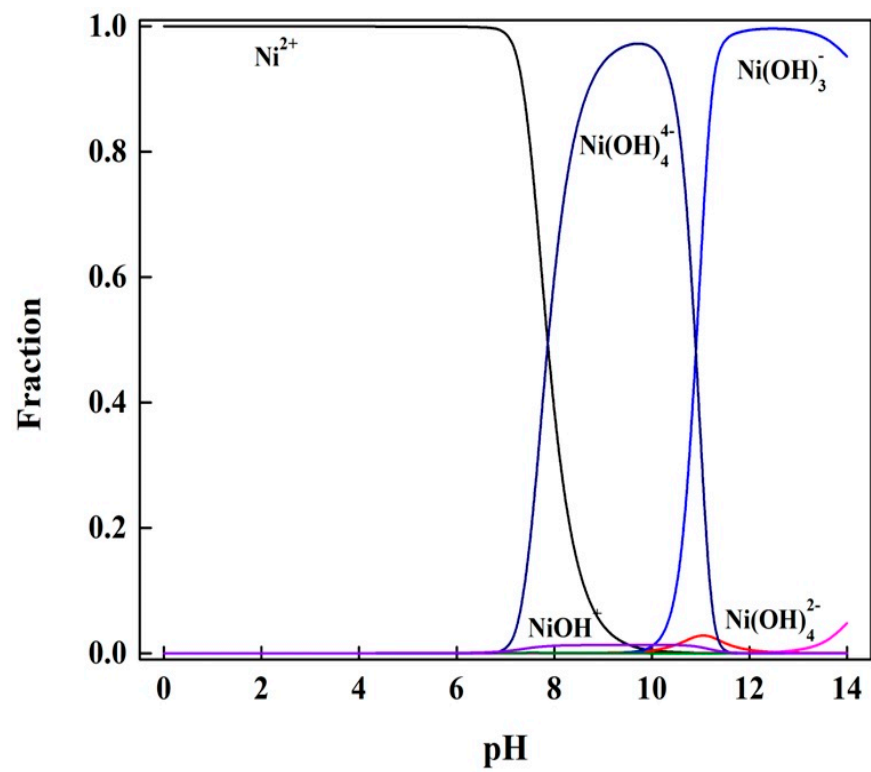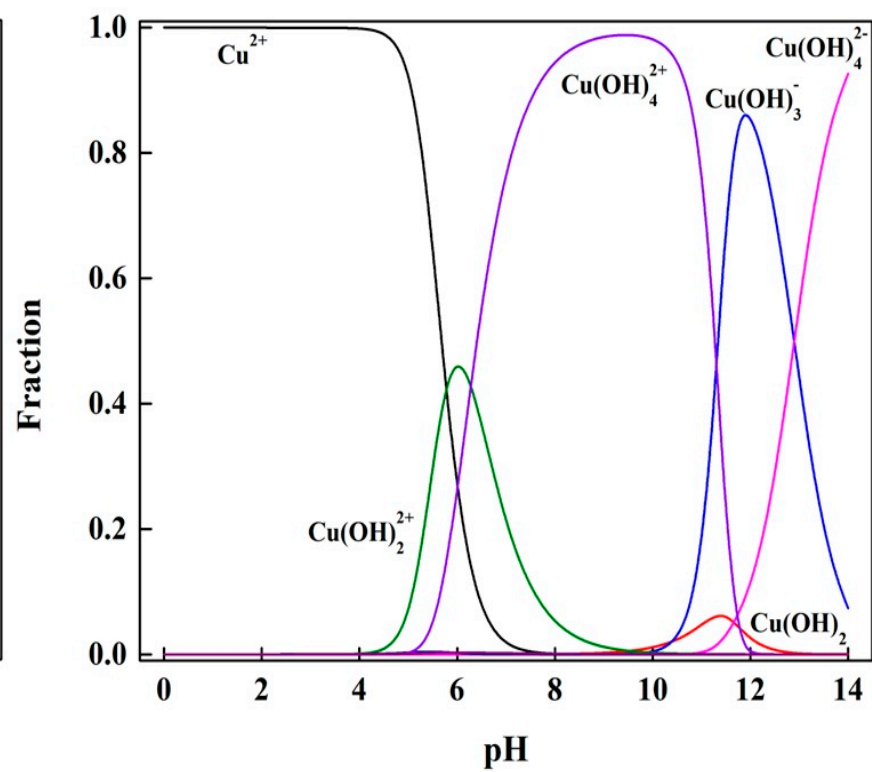

Figure S5. Cu(II) and Ni(II) species diagram in aqueous solution
